# Supplementary material for: Regioselective deuteration of alcohols in D2O catalysed by homogeneous manganese and iron pincer complexes
Source: Royal Society of Chemistry journal article supplement (doi:10.1039/c8gc01052h), 2018-01-01
Supplement: c8gc01052h1.pdf [file c8gc01052h1.pdf]

# Supporting Information

## Regioselective deuteration of alcohols in D<sub>2</sub>O catalysed by homogeneous manganese and iron pincer complexes

Sayan Kar, Alain Goeppert, Raktim Sen, Jotheeswari Kothandaraman, and G. K. Surya Prakash\*

Loker Hydrocarbon Research Institute and Department of Chemistry, University of Southern California, University Park, Los Angeles, California 90089-1661, United States.

Email: [gprakash@usc.edu](mailto:gprakash@usc.edu)

### Table of Contents

|                                                                        |     |
|------------------------------------------------------------------------|-----|
| 1. Materials and methods                                               | S2  |
| 2. Standard procedure for deuteration reactions                        | S2  |
| 3. Selected spectral data for deuteration reactions                    | S3  |
| 3.1. Deuteration of primary alcohols with manganese complex <b>C-1</b> | S3  |
| 3.2. Deuteration of primary alcohols with iron complex <b>C-3</b>      | S8  |
| 3.3. Deuteration of secondary alcohols                                 | S11 |
| 4. Control experiments                                                 | S12 |
| 5. EI-MS analysis of benzyl alcohol before and after deuteration       | S15 |
| 6. Recycling studies                                                   | S17 |
| 7. References                                                          | S18 |

## 1. Materials and methods

All deuteration experiments were carried out under an inert atmosphere (with N<sub>2</sub> or Ar). Complexes MnBrPNP<sup>*i*Pr</sup>(CO)<sub>2</sub> (**C-1**) MnBrPNP<sup>*Cy*</sup>(CO)<sub>2</sub> (**C-2**), and FeHBrPNP<sup>*i*Pr</sup>(CO) (**C-3**) were prepared by previously reported methods.<sup>1,2</sup> All catalysts were weighed inside an argon filled glove box. Alcohols **1-21** and NaOH were bought from commercial vendors and used without further purification. D<sub>2</sub>O (CIL, D-99.5%) was sparged with N<sub>2</sub> for 1 h prior to use. <sup>1</sup>H, <sup>2</sup>H, <sup>31</sup>P and <sup>13</sup>C NMR spectra were recorded on 400 MHz or 500 MHz Varian NMR spectrometers. <sup>1</sup>H and <sup>13</sup>C NMR chemical shifts were determined relative to the residual solvent signals (D<sub>2</sub>O, CDCl<sub>3</sub>). The <sup>2</sup>H NMR chemical shift were determined based on external CDCl<sub>3</sub> reference. Mass spectral data were recorded on a Bruker 300-MS TQ Mass Spectrometer at 70 eV for EI.

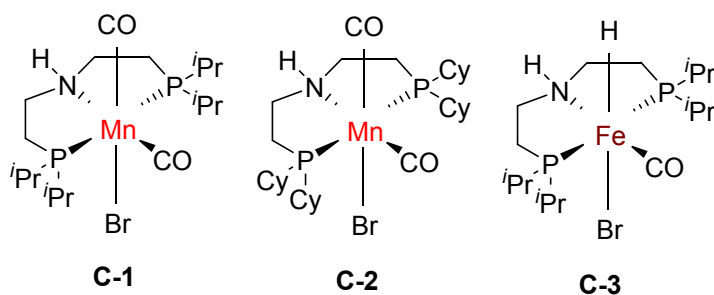

Figure S1. Catalytic complexes screened in this study

## 2. Standard procedure for deuteration reaction

In a J. Young NMR tube (total volume ~2.5 mL), catalyst **C-1/C-2/C-3** was weighed inside an argon globe box, followed by the addition of pre-dissolved NaOH (5-200 mol% with respect to alcohol) in 0.4 mL D<sub>2</sub>O, and alcohol (0.25-0.5 mmol) under nitrogen atmosphere (10  $\mu$ L 1,4-dioxane was additionally added in case of ethanol (**2**), methanol (**3**), ethylene glycol (**13**), and isopropanol (**20**) as an internal standard). The NMR tube was then sealed and a proton NMR spectrum was recorded. Subsequently, the NMR tube was placed in a pre-heated oil bath (100  $^{\circ}$ C - 140  $^{\circ}$ C) for a given amount of time (12-60 h). After the reaction, the NMR tube was cooled to room temperature; after which the <sup>1</sup>H and <sup>13</sup>C NMR spectra were recorded. The amount of deuteration was calculated from the <sup>1</sup>H (and <sup>2</sup>H, whenever necessary) NMR spectra based on integral ratios of nondeuterable peaks (not  $\alpha/\beta$ )/ internal standard peak with deuterated peaks. The deuterated

alcohols were isolated through extraction with  $\text{CDCl}_3$ . Maximum theoretical deuteration achievable were calculated based on the numbers of exchangeable proton and deuterium atoms present in the system. For example, for Table 1, entry 1, total exchangeable H atoms =  $[0.5 \times 5$  (from  $n\text{-BuOH}$ ) +  $1.0$  (from  $\text{NaOH}$ )] mmol =  $3.5$  mmol. Total exchangeable D atom =  $[400 \times 1.11 \times 2/20]$  (from  $\text{D}_2\text{O}$ ;  $d = 1.11$ ;  $\text{MW} = 20$ ) =  $44.4$  mmol. So, the theoretical maximum deuteration =  $[44.4/(44.4+3.5)] \times 100\% = 93\%$

### 3. Selected spectral data for deuteration reactions

#### 3.1. Deuteration of primary alcohols with manganese complex C-1

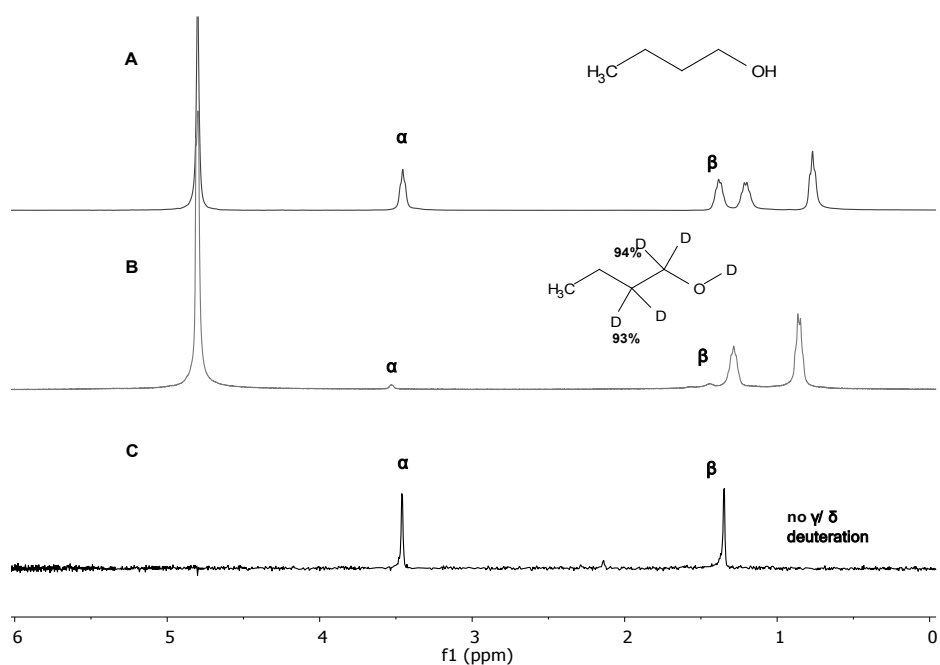

**Figure S2.**  $^1\text{H}$  spectra of deuteration of 1 before (A) and after (B) reaction and  $^2\text{H}$  spectra of deuterated  $n$ -butanol (C). Reaction conditions: 1 (0.5 mmol), C-1 (1mol%), NaOH (5 mol%),  $\text{D}_2\text{O}$  (0.4 mL),  $120^\circ\text{C}$ , 12 h.

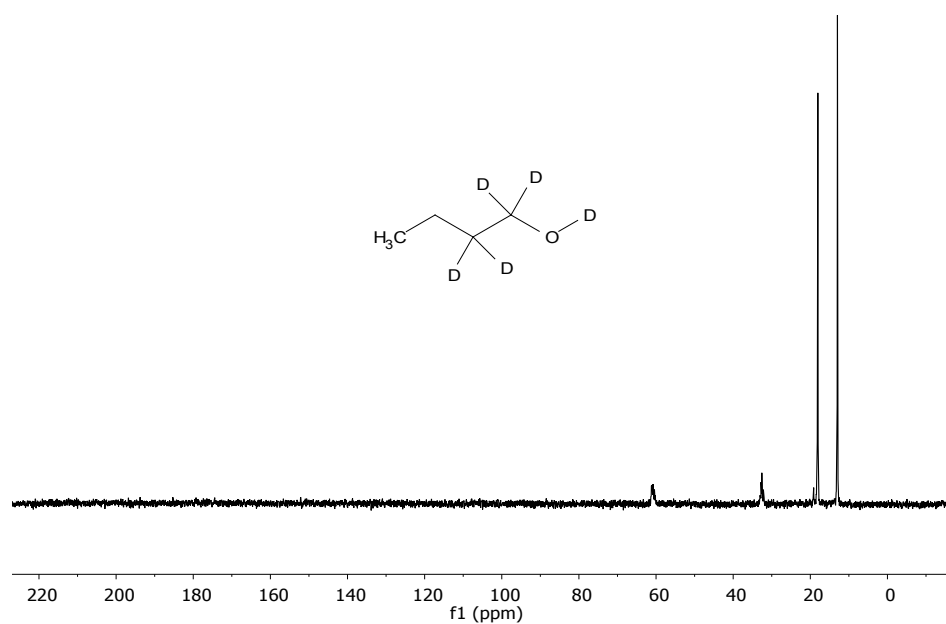

**Figure S3.** <sup>13</sup>C spectra of deuterated (α, β) n-butanol (**1**) in D<sub>2</sub>O. Reaction conditions: **1** (0.5 mmol), **C-1** (1mol%), NaOH (5 mol%), D<sub>2</sub>O (0.4 mL), 120 °C, 12 h.

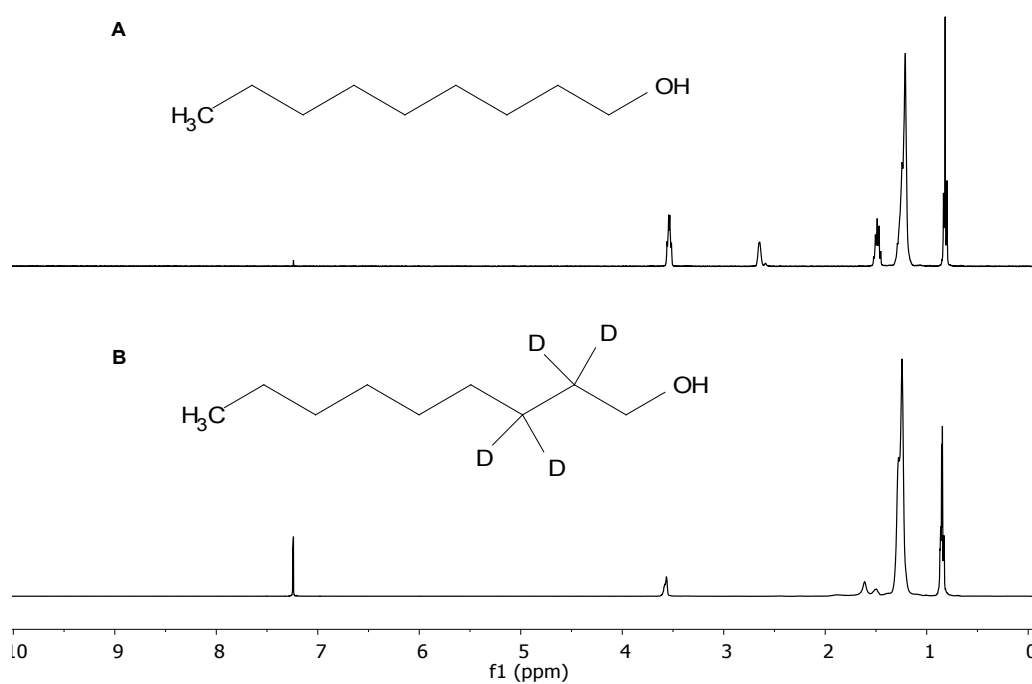

**Figure S4.** <sup>1</sup>H spectra of **4** before (**A**) and after (**B**) reaction. Reaction conditions: **4** (0.5 mmol), **C-1** (1 mol%), NaOH (5 mol%), D<sub>2</sub>O (0.4 mL), 120 °C, 12 h.

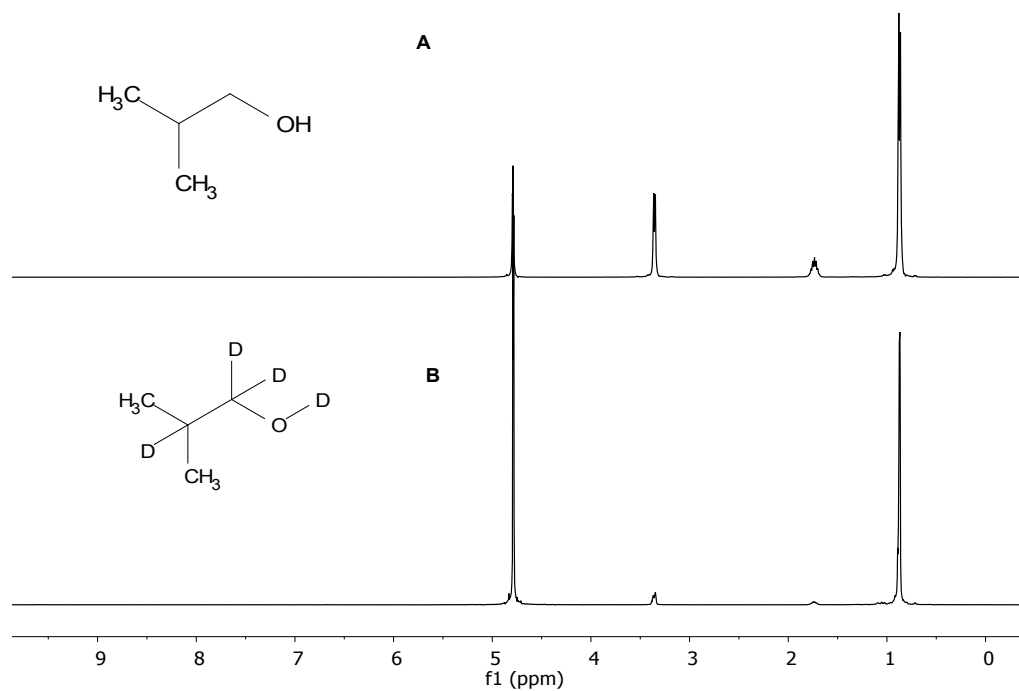

**Figure S5.  $^1\text{H}$  spectra of deuteration of 5 before (A) and after (B) reaction.** Reaction conditions: **5** (0.5 mmol), **C-1** (0.5 mol%), NaOH (5 mol%), D<sub>2</sub>O (0.4 mL), 120 °C, 12 h.

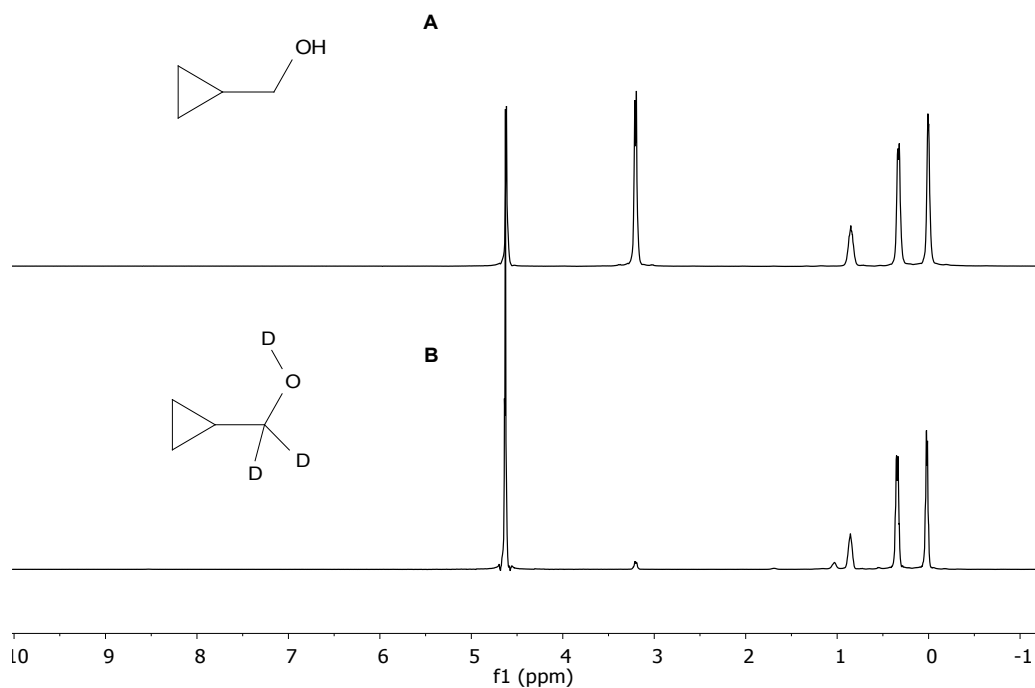

**Figure S6.  $^1\text{H}$  spectra of deuteration of 6 before (A) and after (B) reaction.** Reaction conditions: **6** (0.5 mmol), **C-1** (0.5 mol%), NaOH (5 mol%), D<sub>2</sub>O (0.4 mL), 120 °C, 12 h.

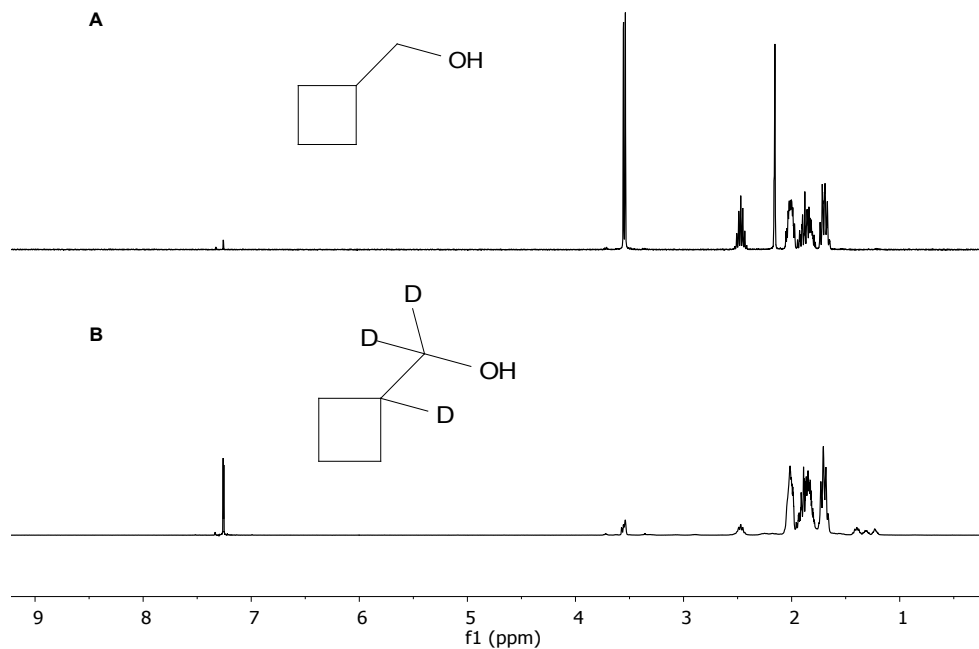

**Figure S7.**  $^1\text{H}$  spectra of **7** before (A) and after (B) reaction. Reaction conditions: **7** (0.5 mmol), **C-1** (1 mol%), NaOH (5 mol%),  $\text{D}_2\text{O}$  (0.4 mL),  $120^\circ\text{C}$ , 12 h.

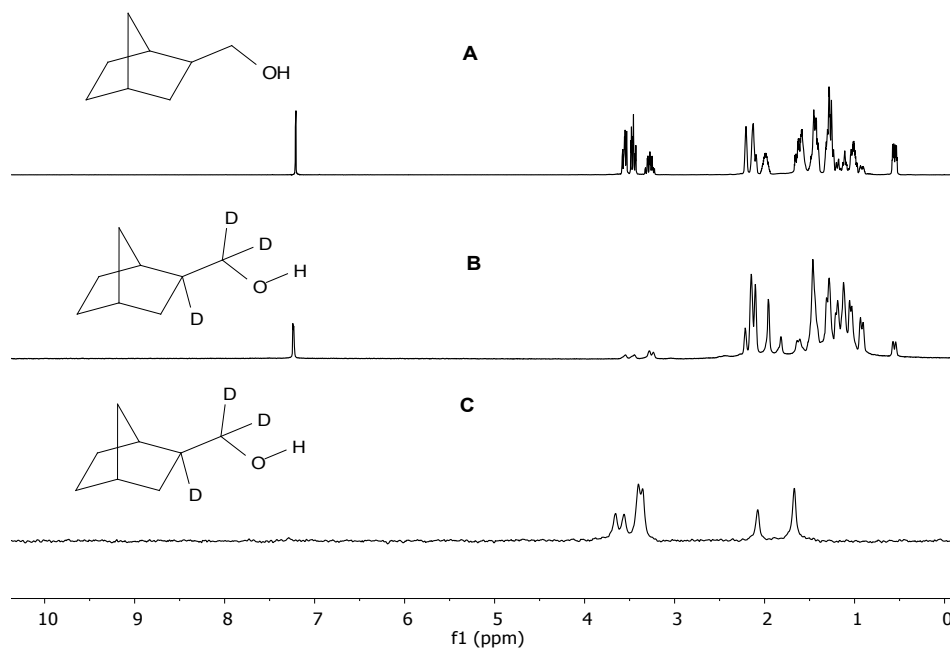

**Figure S8.**  $^1\text{H}$  spectra of **9** before (A) and after (B) reaction and  $^2\text{H}$  spectra of deuterated **9** (C). Reaction conditions: **9** (0.5 mmol), **C-1** (1 mol%), NaOH (5 mol%),  $\text{D}_2\text{O}$  (0.4 mL),  $120^\circ\text{C}$ , 12 h.

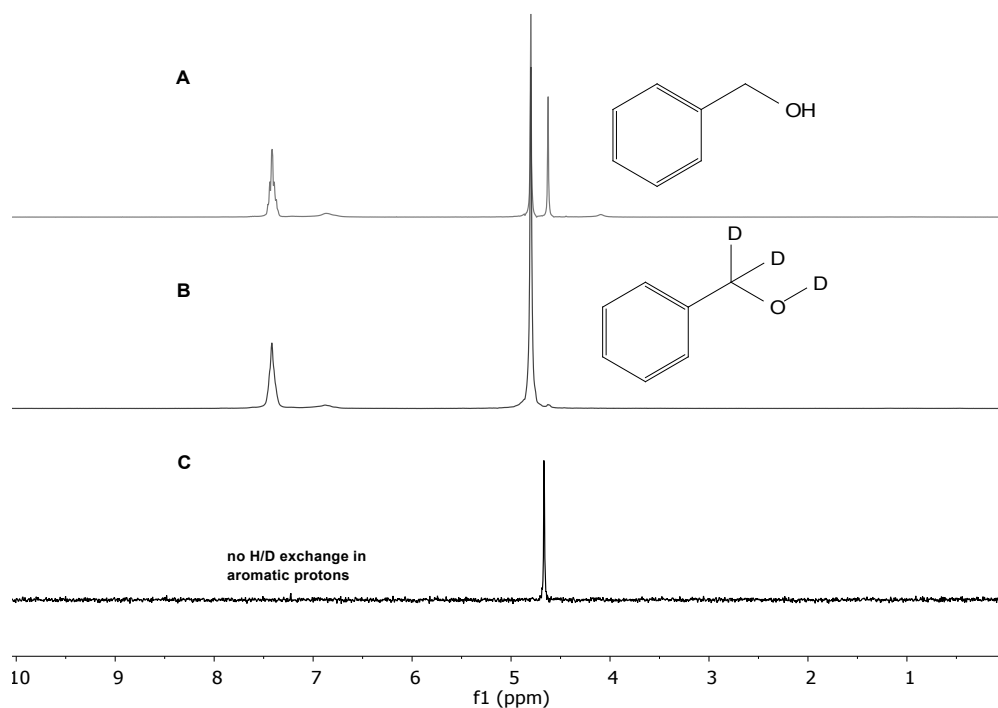

**Figure S9.**  $^1\text{H}$  spectra of **10** before (A) and after (B) reaction and  $^2\text{H}$  spectra of deuterated **10** (C). Reaction conditions: **10** (0.5 mmol), **C-1** (0.5 mol%), NaOH (5 mol%),  $\text{D}_2\text{O}$  (0.4 mL), 120  $^\circ\text{C}$ , 12 h.

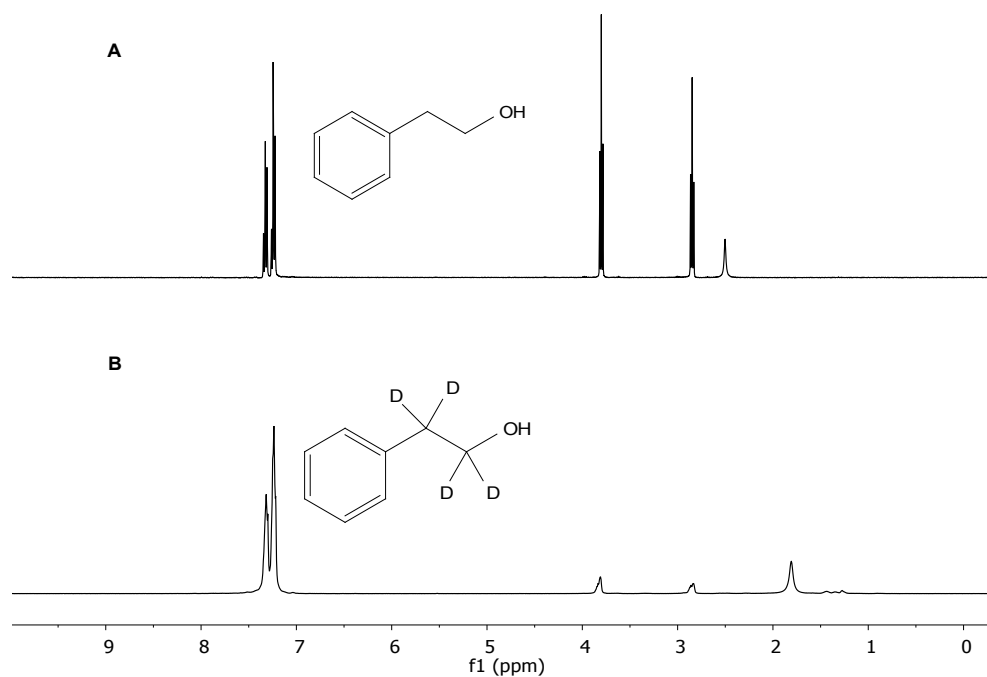

**Figure S10.**  $^1\text{H}$  spectra of **12** before (A) and after (B) reaction. Reaction conditions: **12** (0.5 mmol), **C-1** (0.5 mol%), NaOH (5 mol%),  $\text{D}_2\text{O}$  (0.4 mL), 120  $^\circ\text{C}$ , 12 h.

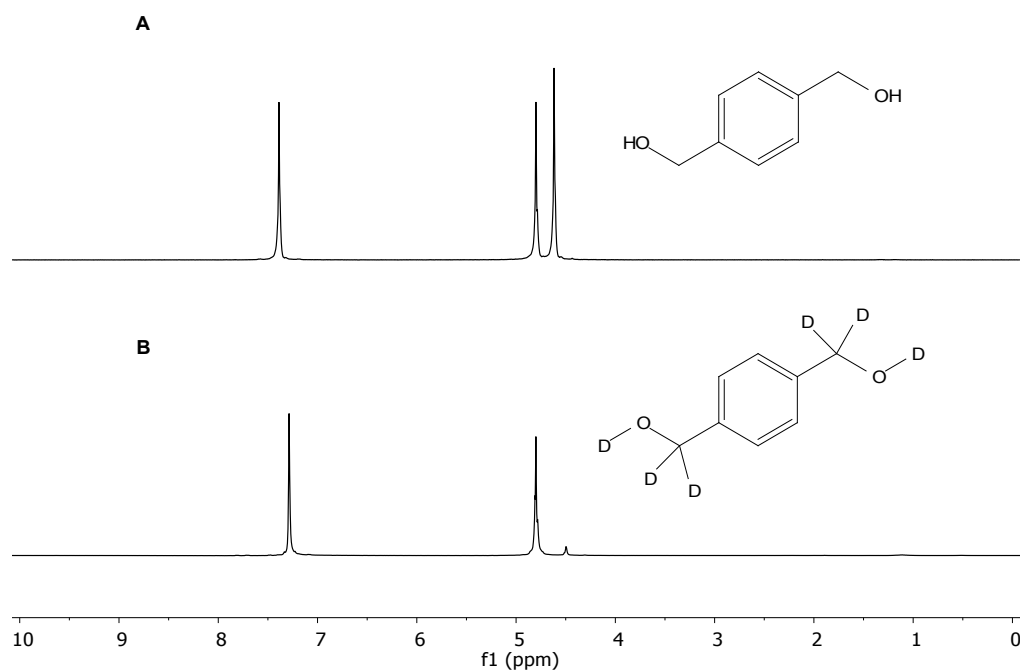

**Figure S11.**  $^1\text{H}$  spectra of **15** before **(A)** and after **(B)** reaction. Reaction conditions: **15** (0.5 mmol), **C-1** (1 mol%), NaOH (5 mol%),  $\text{D}_2\text{O}$  (0.4 mL), 120  $^\circ\text{C}$ , 12 h.

### 3.2. Deuteration of primary alcohols with iron complex C-3

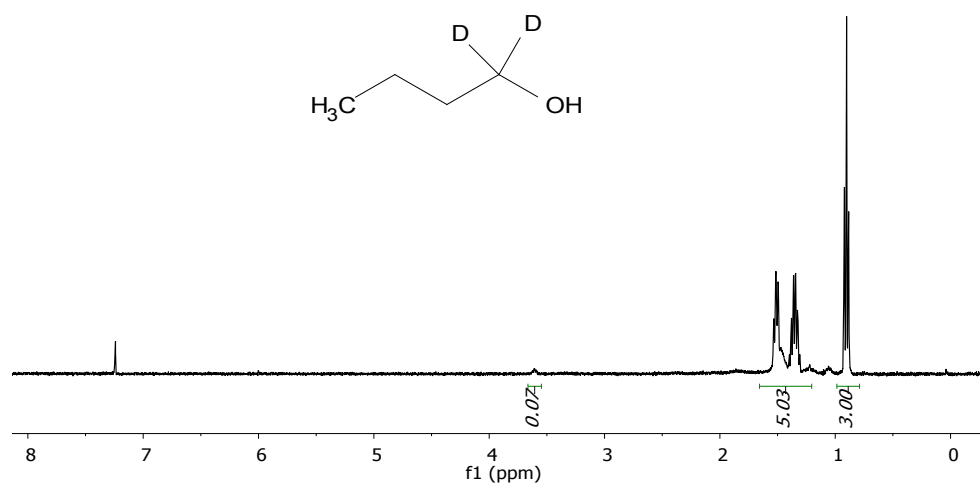

**Figure S12.**  $^1\text{H}$  spectra of  $\alpha$ -deuterated **1**. Reaction conditions: **1** (0.25 mmol), **C-3** (2 mol%), NaOH (10 mol%),  $\text{D}_2\text{O}$  (0.4 mL), 100  $^\circ\text{C}$ , 24 h.



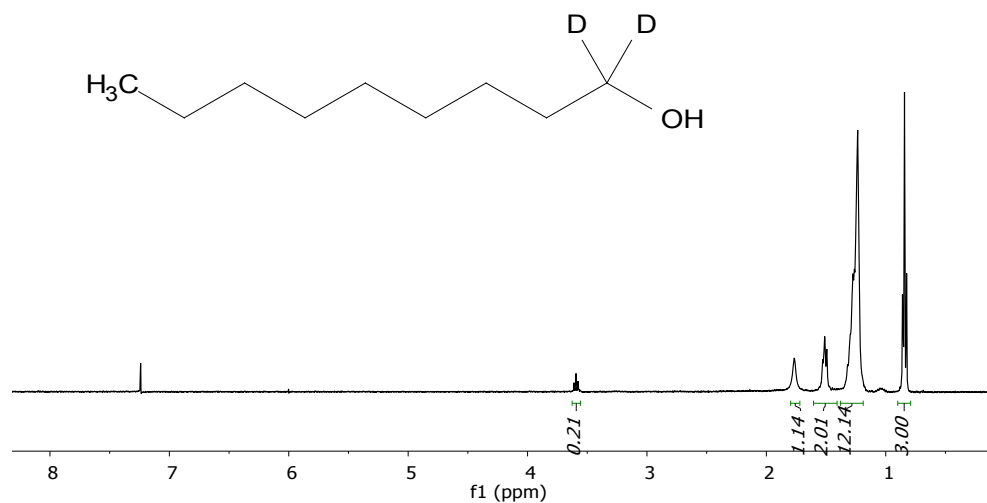

**Figure S13.**  $^1\text{H}$  spectra of  $\alpha$ -deuterated 4. Reaction conditions: 4 (0.25 mmol), C-3 (2 mol%), NaOH (10 mol%), D<sub>2</sub>O (0.4 mL), 100 °C, 24 h.

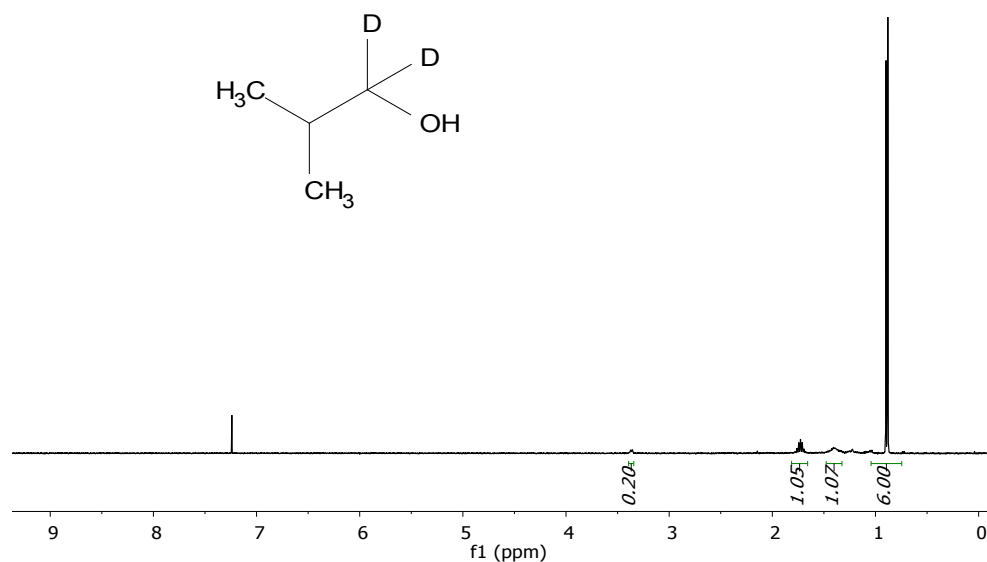

**Figure S14.**  $^1\text{H}$  spectra of  $\alpha$ -deuterated 5. Reaction conditions: 5 (0.25 mmol), C-3 (2 mol%), NaOH (10 mol%), D<sub>2</sub>O (0.4 mL), 100 °C, 24 h.

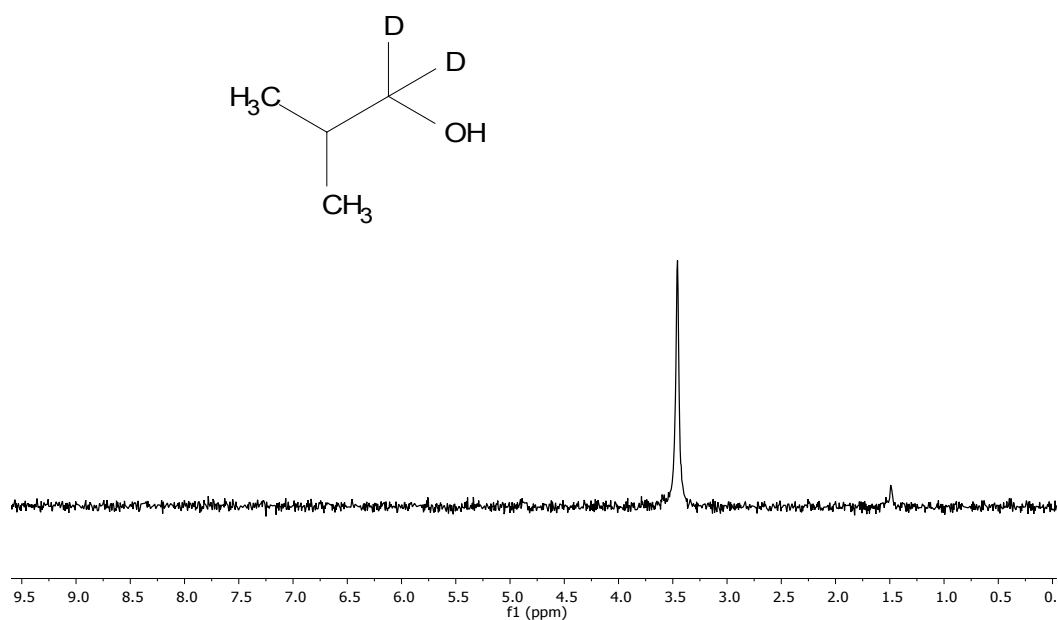

**Figure S15.  $^2\text{H}$  spectra of  $\alpha$ -deuterated 5.** Reaction conditions: **5** (0.25 mmol), **C-3** (2 mol%), NaOH (10 mol%),  $\text{D}_2\text{O}$  (0.4 mL), 100 °C, 24 h.

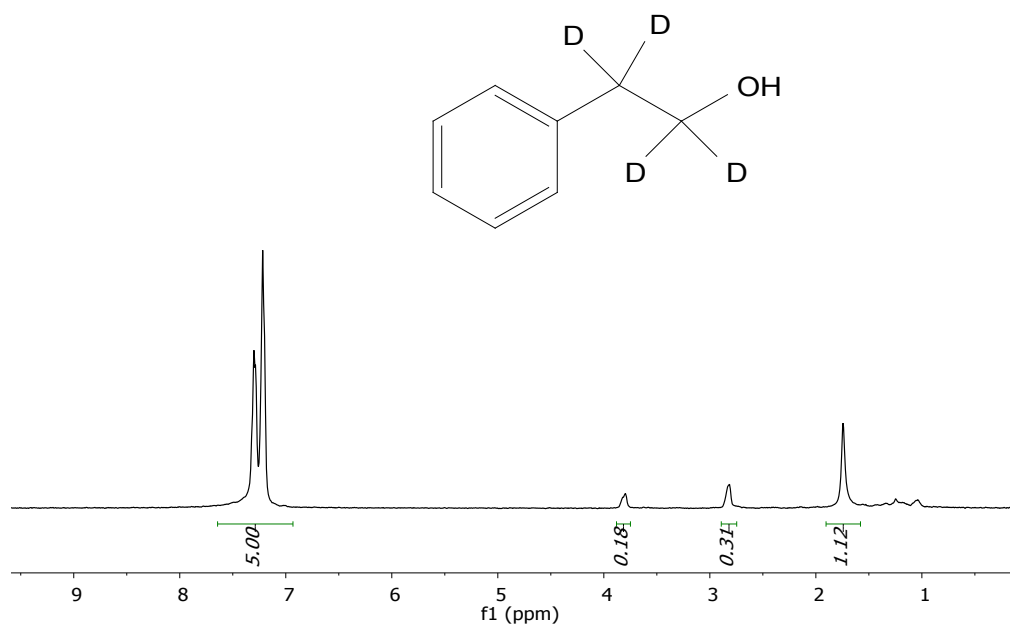

**Figure S16.  $^1\text{H}$  spectra of  $\alpha, \beta$ -deuterated 12.** Reaction conditions: **12** (0.25 mmol), **C-3** (2 mol%), NaOH (10 mol%),  $\text{D}_2\text{O}$  (0.4 mL), 100 °C, 24 h.

### 3.2. Deuteration of secondary alcohol

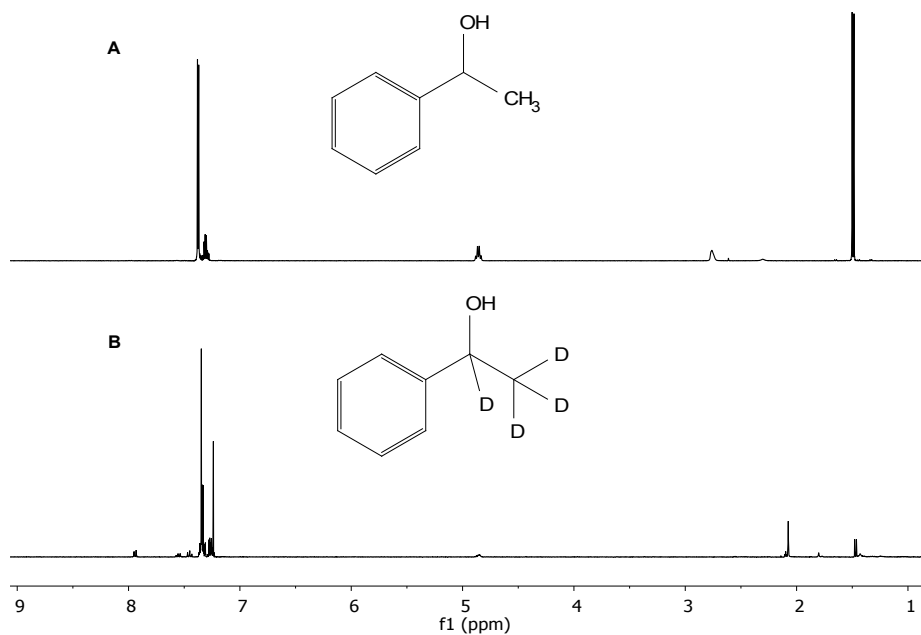

**Figure S17.**  $^1\text{H}$  spectra of **17** before (A) and after (B) reaction. Reaction conditions: **17** (0.5 mmol), **C-1** (2 mol%), NaOH (5 mol%),  $\text{D}_2\text{O}$  (0.4 mL), 140 °C, 30 h.

Deuterium\_01  
SK2-29-40

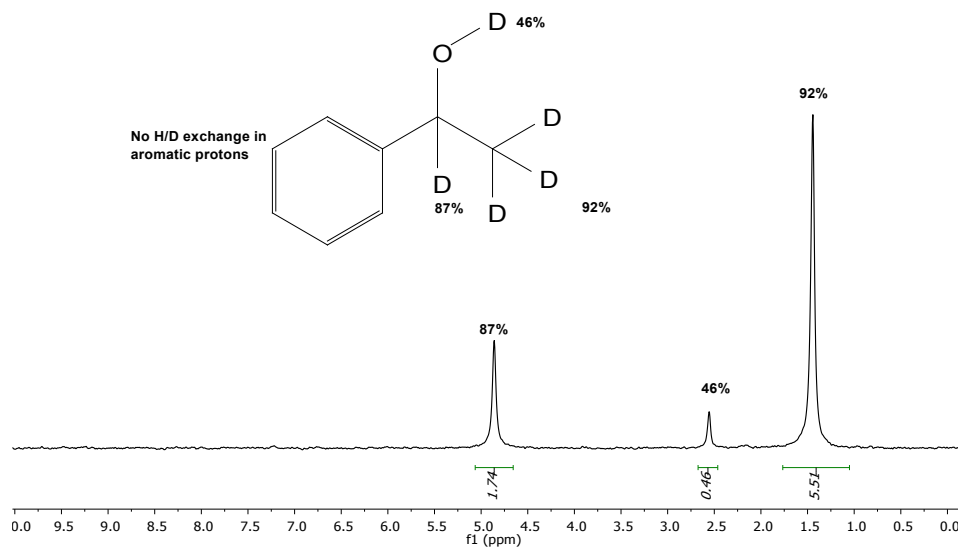

**Figure S18.**  $^2\text{H}$  spectra of **17** after reaction. Reaction conditions: **17** (0.5 mmol), **C-1** (2 mol%), NaOH (5 mol%),  $\text{D}_2\text{O}$  (0.4 mL), 140 °C, 30 h.

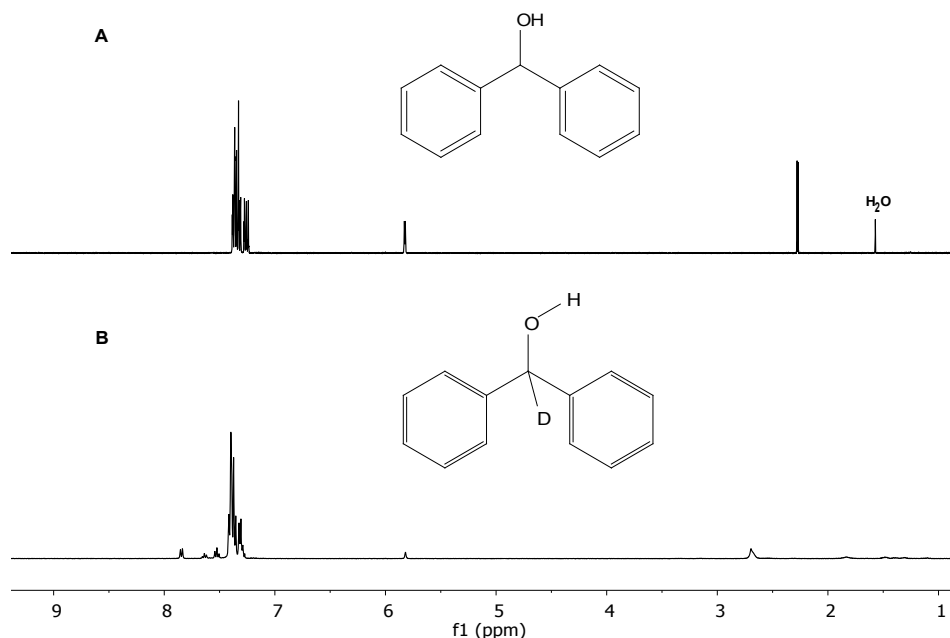

**Figure S19.**  $^1\text{H}$  spectra of **19** before (A) and after (B) reaction. Reaction conditions: **19** (0.5 mmol), **C-1** (2 mol%), NaOH (5 mol%),  $\text{D}_2\text{O}$  (0.4 mL), 140  $^\circ\text{C}$ , 30 h.

#### 4. Control experiments performed to understand the reaction mechanism

##### Observation of the active catalytic species in the reaction mixture

In a J Young NMR tube (total volume  $\sim 2.5$  mL), catalyst **C-1** was weighed inside an argon globe box, followed by the addition of pre-dissolved NaOH (5 mol% with respect to alcohol) in 0.4 mL  $\text{D}_2\text{O}$ , and *n*-butanol (0.5 mmol) under nitrogen atmosphere. The NMR tube was then sealed and placed in a pre-heated oil bath (120  $^\circ\text{C}$ ). After 1 h, the NMR tube was cooled to room temperature and 0.2 mL THF was added to the reaction mixture. The resultant homogeneous solution was then analyzed by  $^{31}\text{P}$  NMR spectroscopy.

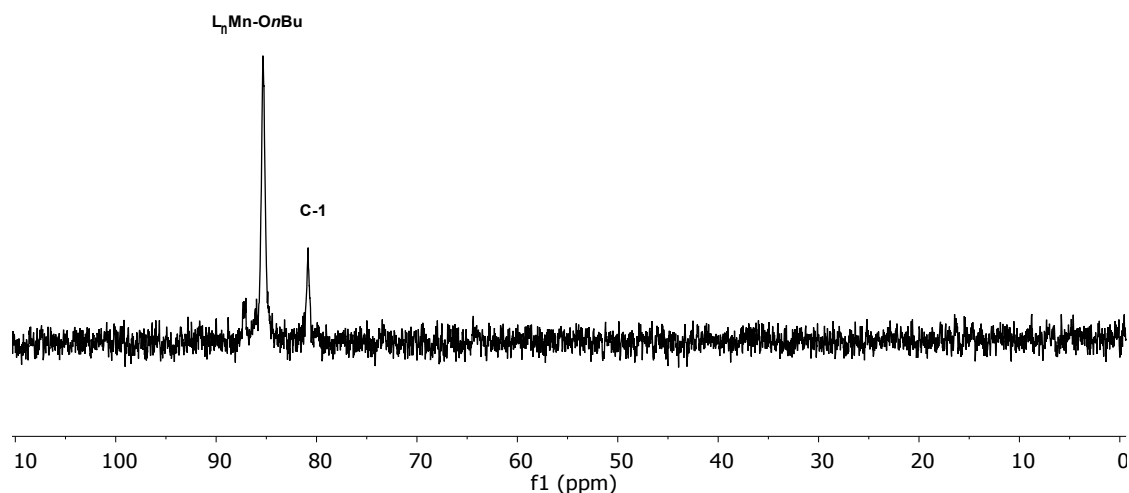

**Figure S20.** Active species detected in the reaction mixture through  $^{31}\text{P}$  NMR after 1 h (0.2 mL THF was added to the reaction mixture to form a homogeneous solution)

#### Formation of manganese deuteroxide species (**C-1B**)

In a 50 mL Schlenk flask, **C-1** (0.05 mmol) was weighed inside an argon glove box and subsequently dissolved in 5 mL of dry and degassed THF in a nitrogen atmosphere, followed by the addition of 1 mmol of *t*-BuOK (weighed inside an argon glove box). The formation of the manganese amido complex (**C-1A**) was observed as a red solution. After stirring the resulting solution for 15 minutes, the red solution was filtered through Celite, and 5 mmol  $\text{D}_2\text{O}$  was subsequently added to the filtrate. The solution immediately turned yellow, signifying the formation of a deuteroxide species. The solution was stirred for 30 minutes, after which the solvents were removed *in vacuo*. Benzene- $\text{d}_6$  was used as the deuterated solvent for the  $^{31}\text{P}$  NMR analysis of the resulting **C-1B**.

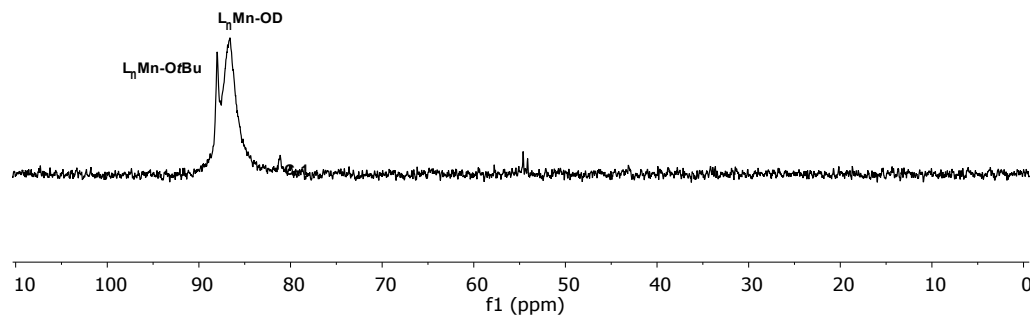

**Figure S21.**  $^{31}\text{P}$  spectra of manganese deuterioxy species  $[\text{Mn}(\text{OD})\text{PN}_\text{D}^{\text{Pr}}(\text{CO})_2]$  (**C-1B**).

### $\alpha$ , $\beta$ deuteration of n-butanol with **C-1B**

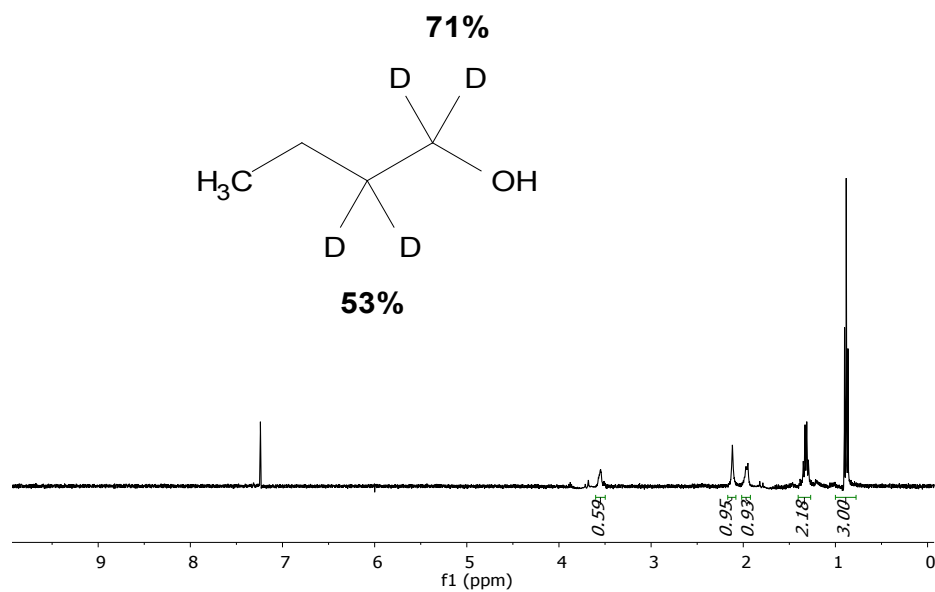

**Figure S22.** Deuteration of **1** by manganese deuterioxy complex (**C-1B**) without added base, Signifying the ability of **C-1B** to form **C-1A** in the solution at 120 °C. (THF peaks suppressed)

## 5. EI-MS analysis of benzyl alcohol before and after deuteration

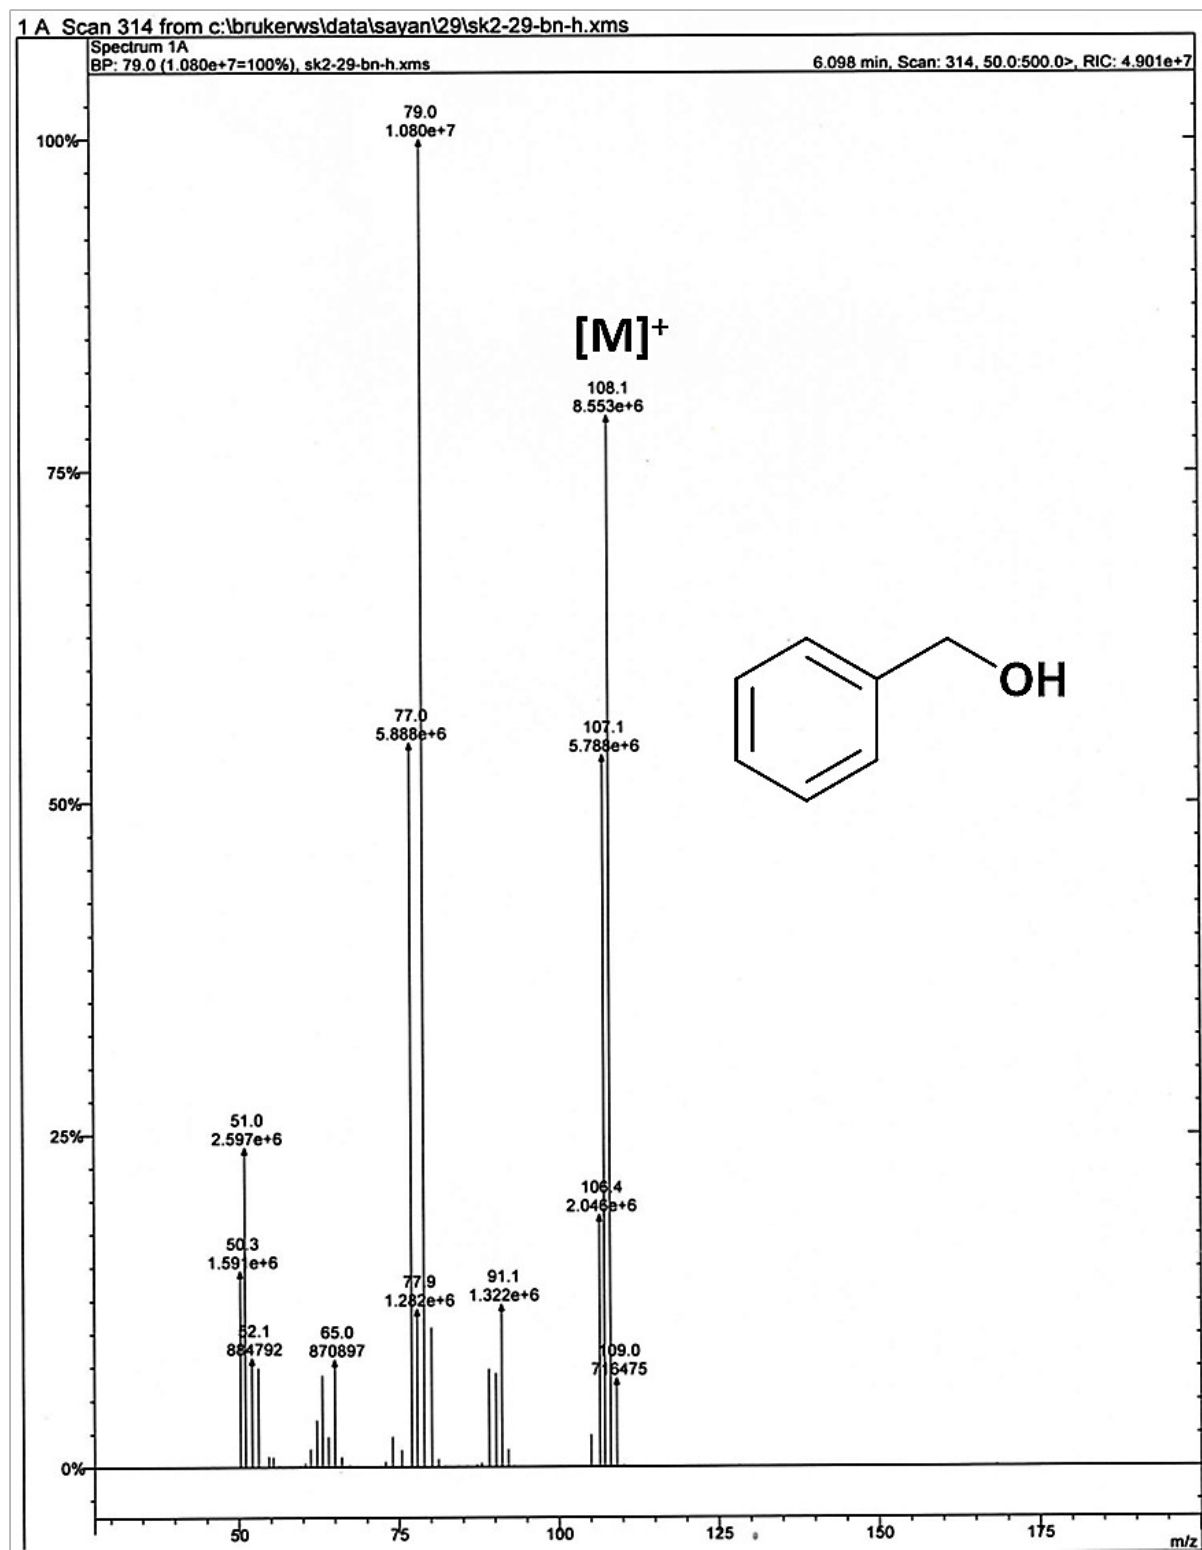

Figure S23. EI-MS spectra of benzyl alcohol

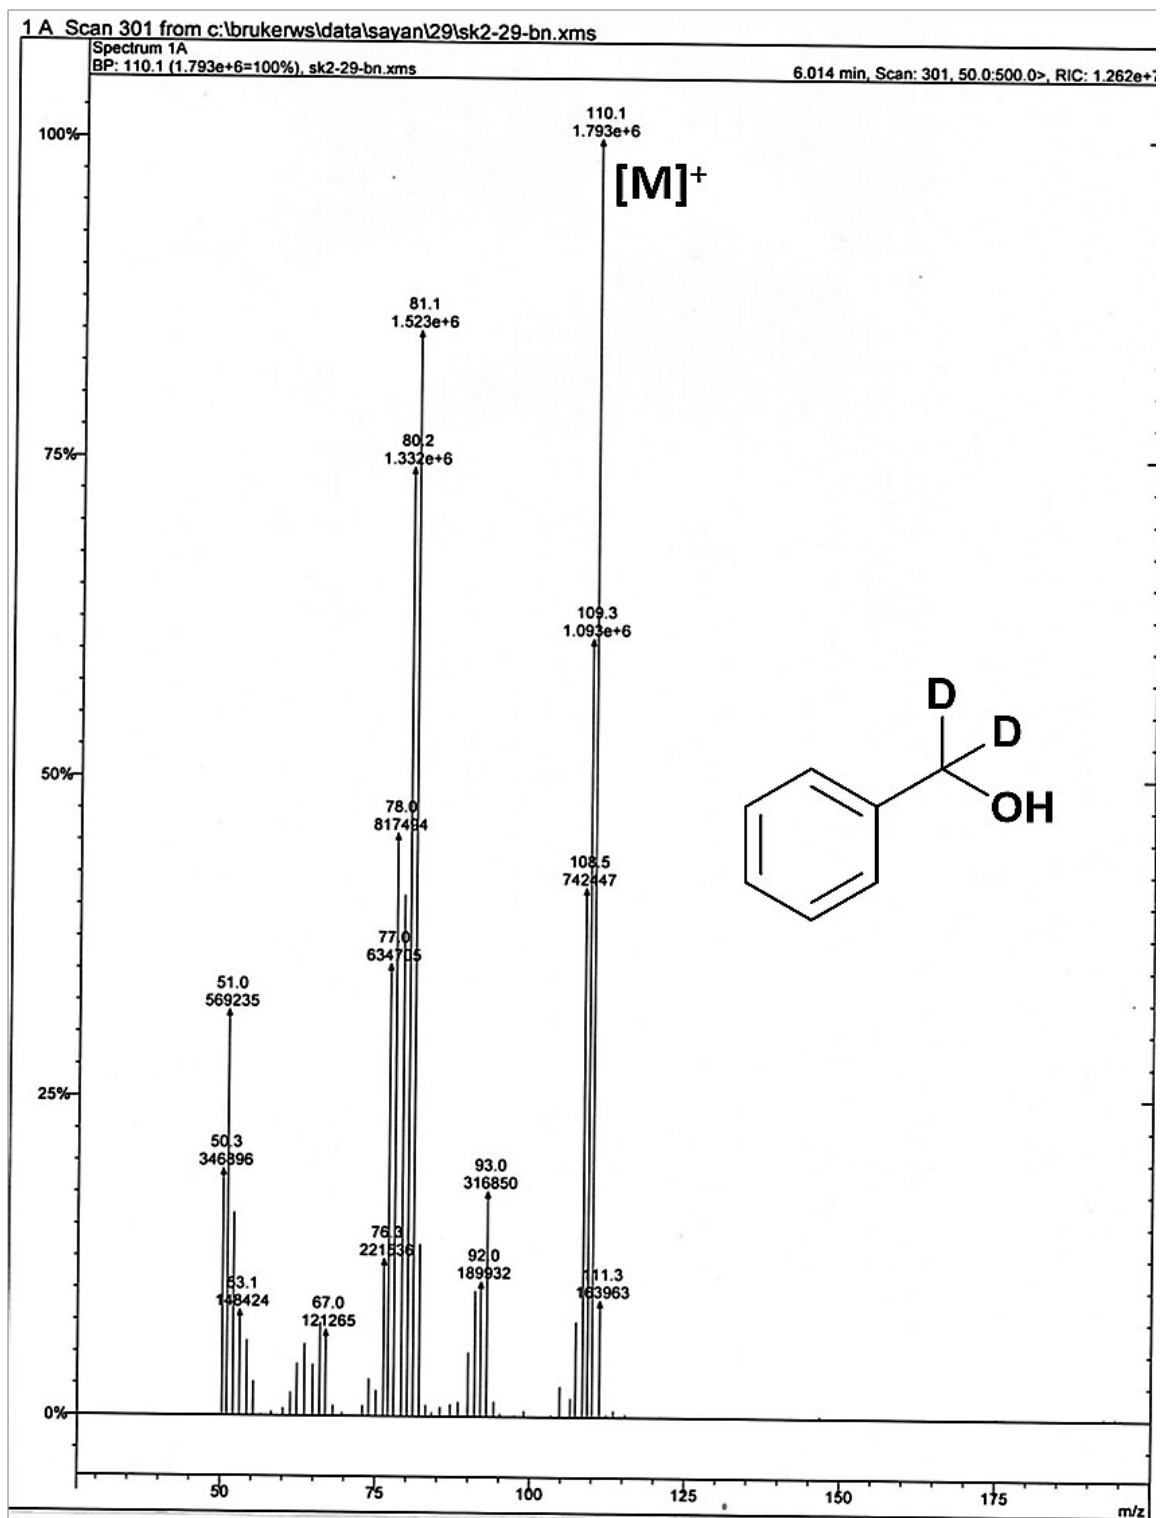

**Figure S24.** EI-MS spectra of  $\alpha$  deuterated benzyl alcohol. Reaction conditions: benzyl alcohol (0.5 mmol), **C-1** (0.5 mol%), NaOH (5 mol%), D<sub>2</sub>O (0.4 mL), 120 °C, 12 h.



## 6. Recycling studies

### Standard procedure:

In a J. Young NMR tube (total volume ~2.5 mL), catalyst **C-1** (2 mol%, 0.01 mmol) was weighed inside an argon globe box, followed by the addition of pre-dissolved NaOH (5 mol% with respect to alcohol) in 0.5 mL D<sub>2</sub>O, and alcohol (0.5 mmol) under nitrogen atmosphere. The NMR tube was then sealed and a proton NMR spectrum was recorded. Subsequently, the NMR tube was placed in a pre-heated oil bath (120 °C) for a given amount of time (12 h). After the reaction, the NMR tube was cooled to room temperature; after which a <sup>1</sup>H NMR spectra was recorded. Subsequently, in a nitrogen atmosphere, 0.4 mL of degassed chloroform was added to the NMR tube. From the resulting biphasic solution, the top D<sub>2</sub>O (with NaOH) layer was separated to afford a yellow solution. The catalyst was then recovered by removing the deuterated *n*-BuOH and CHCl<sub>3</sub> in vacuo. The recovered catalyst inside the J. Young NMR tube then recharged with fresh *n*-BuOH (0.5 mmol), NaOH (5 mol%) and D<sub>2</sub>O (0.5 mL) for the next cycle.

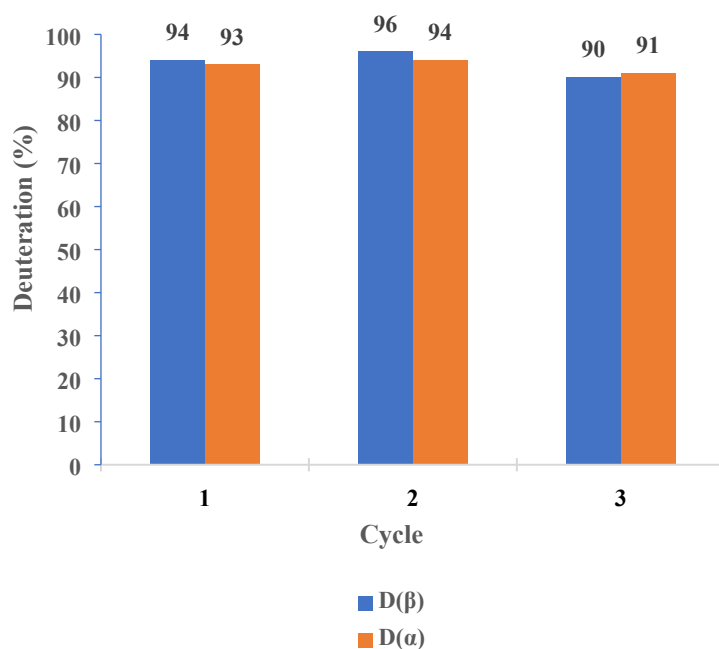

**Figure S25.  $\alpha$  and  $\beta$  deuteration observed in successive cycles.** *n*-butanol (0.5 mmol), **C-1** (2 mol%), NaOH (5 mol%), D<sub>2</sub>O (0.5 mL), 120 °C, 12 h.

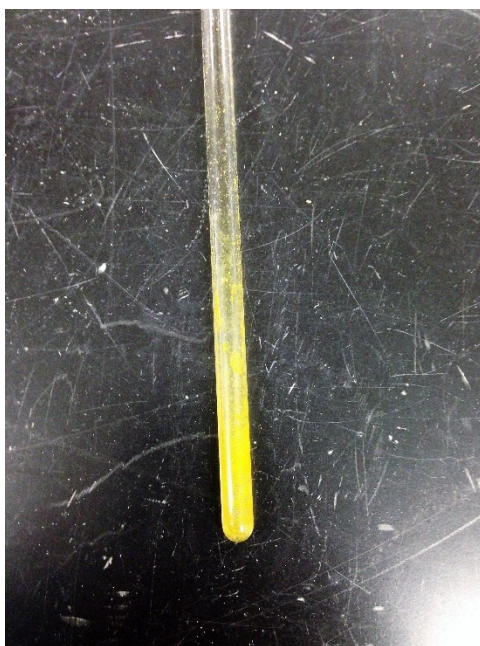

**Figure S26.** Image of the recovered catalyst inside the J.Young NMR tube

## 7. References

1. Elangovan, S.; Topf, C.; Fischer, S.; Jiao, H.; Spannenberg, A.; Baumann, W.; Ludwig, R.; Junge, K.; Beller, M. *J. Am. Chem. Soc.* **2016**, *138*, 8809–8814.
2. (a) Kothandaraman, J.; Goeppert, A.; Czaun, M.; Olah, G. A.; Prakash, G. K. S. *Green Chem.* **2016**, *18* (21), 5831-5838. (b) S. Chakraborty, H. Dai, P. Bhattacharya, N. T. Fairweather, M. S. Gibson, J. A. Krause and H. Guan, *J. Am. Chem. Soc.* **2014**, *136*, 7869-7872.
